# Supplementary material for: Empirical evidence of widespread exaggeration bias and selective reporting in ecology
Source: Springer Nature journal article supplement (doi:10.1038/s41559-023-02144-3), 2023-08-03
Supplement: 41559_2023_2144_MOESM1_ESM.pdf [file 41559_2023_2144_MOESM1_ESM.pdf]

# Empirical evidence of widespread exaggeration bias and selective reporting in ecology

---

In the format provided by the authors and unedited

---

1 **TABLE OF CONTENTS**

2 **SUPPLEMENTARY TEXT..... 2**

3 *Supplemental Figure 1. Unweighted distribution of (A) partial correlation coefficients (PCC) and (B) standard*  
4 *errors of the partial correlation coefficients calculated in our collection of studies. .... 2*

5 **PROMISING ACTIONS THAT CONTRIBUTE TO THE LARGER-SCALE SYSTEMIC**  
6 **CHANGES THAT ARE NEEDED ..... 3**

7 CHECKLISTS & DATA AND CODE SHARING REQUIREMENTS ..... 3

8 PRE-REGISTRATION AND PRE-ANALYSIS PLANS..... 4

9 REGISTERED REPORTS & RESULTS-BLIND REVIEWS ..... 8

10 *Supplemental Table 1. Ecology or general interest journals that offer Registered Report format as of January*  
11 *16, 2023..... 10*

12 CHANGING INCENTIVES ..... 11

13 **SUPPLEMENTAL REFERENCES..... 13**

14

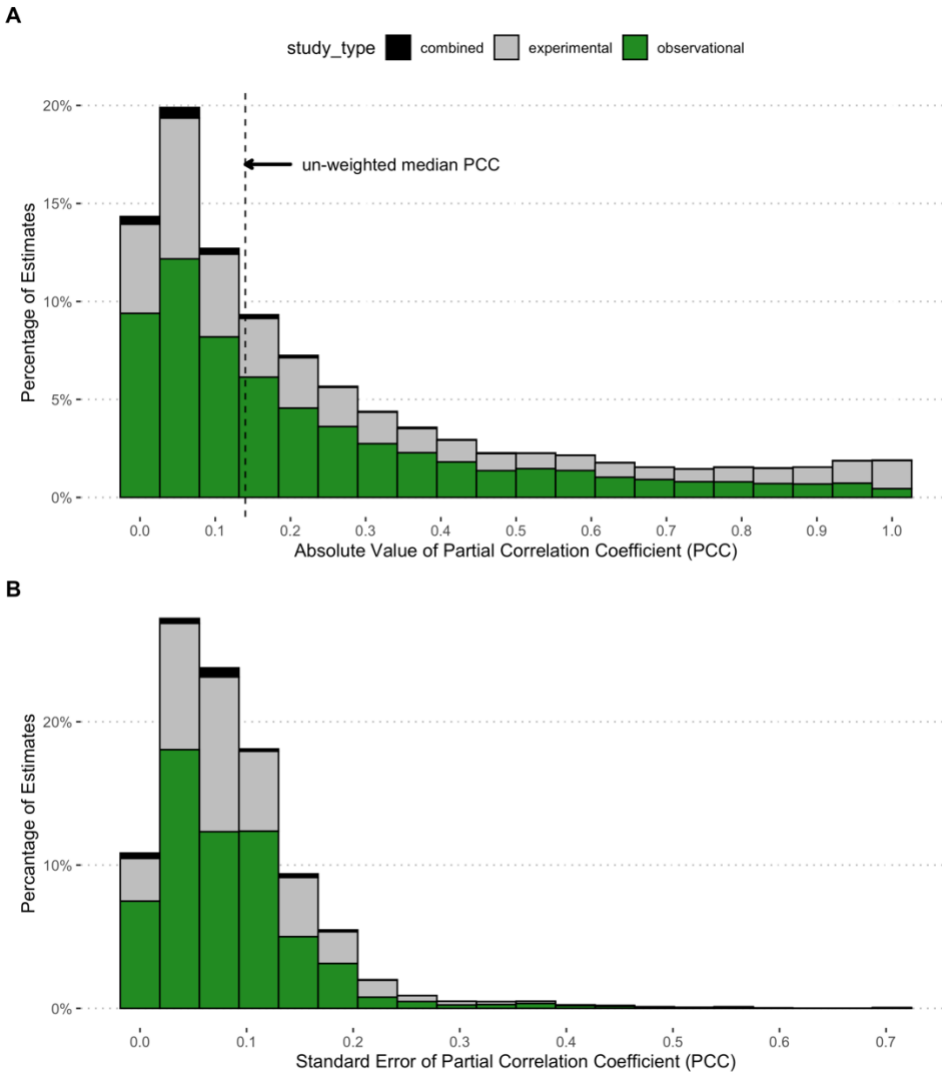

16

17 **Supplemental Figure 1. Unweighted distribution of (A) partial correlation coefficients (PCC) and (B)**

18 **standard errors of the partial correlation coefficients calculated in our collection of studies. The weighted**

19 **mean PCC value was 0.06, and the unweighted median is shown at the dashed line in A (~0.15).**

20 **In both graphs, bars are colored according to the proportion of observational (green),**

21 **experimental (gray), and combined (black) studies in that bin (n = 18,909 estimates from 353**

22 **papers).**

23

24 *Promising actions that contribute to the larger-scale systemic changes that are needed*

### 25 Checklists & Data and Code Sharing Requirements

26 We faced multiple challenges in aggregating the data from our set of published articles because  
27 studies often did not report key information. For example, determining sample sizes was not  
28 always straightforward. In some cases, we had to make assumptions about the total sample size  
29 when the authors ran different analyses but did not report changes in sample size across the  
30 analyses. We had to exclude 5,484 estimates from 34 studies because we could not determine the  
31 sample size that the researchers were using (see “Data Cleaning”). While it is likely that most  
32 ecologists do not intentionally leave out important information, leaving this information out  
33 makes it difficult to interpret the results or aggregate them into meta-analyses.

34 So that readers may adequately judge the methods, analysis, and results in a study, ecologists  
35 should make sure to report all necessary information. Necessary information includes sample  
36 sizes and degrees of freedom for each analysis, estimates of error or uncertainty, and descriptions  
37 of the originally planned analyses and any deviations from those plans <sup>1</sup>.

38 Checklists at multiple stages of the publication process can help researchers and reviewers  
39 include necessary information <sup>2-4</sup>. Checklists are used to reduce mistakes in other professions  
40 like surgery <sup>5</sup> and airplane piloting <sup>6</sup>. Individual labs, departments, or professional societies can  
41 provide checklists to researchers for standardized information to report in all publications <sup>2</sup>.

42 More impactfully, journals can provide checklists that authors must fill out before submitting  
43 their manuscripts, similar to *Nature* ([https://www.nature.com/documents/nr-reporting-summary-  
44 flat.pdf](https://www.nature.com/documents/nr-reporting-summary-flat.pdf)). Further, reviewers can be provided checklists as well to standardize what they should  
45 be looking for when assessing the soundness of methods, analysis, and reported results <sup>4</sup>.

46 Checklists at the review stage may also reduce bias against negative results, which tend to be

47 scrutinized more than positive results <sup>4,7</sup>. Overall, checklists should provide an easy way to  
48 increase the transparency of ecological publications and make it easier for readers to find the  
49 necessary information to synthesize effect sizes and uncertainty in those estimates.

50 Researchers should also be required to provide data and code as a condition for manuscript  
51 publication (and the code should run with little or no manipulation). Exceptions can be allowed  
52 for some proprietary data. Many journals are moving towards encouraging data and code  
53 sharing, but few require archiving of both data and code <sup>8</sup>. Such requirements do, however, seem  
54 to increase the likelihood of providing data and code. For example, in our dataset, every paper in  
55 *Journal of Ecology* had data available, which highlights the effectiveness of journals requiring  
56 data archiving once papers are accepted  
57 (<https://besjournals.onlinelibrary.wiley.com/hub/editorial-policies#archiving>). Indeed, providing  
58 data and analytic code increases the transparency of workflows and conclusions reported in  
59 studies <sup>1,9-11</sup>. Journals may even consider having a reviewer check code files to see if the study  
60 results are reproducible with the code and data that they authors provide (see, for example, the  
61 data editor positions at the *American Naturalist* [[http://comments.amnat.org/2021/01/note-since-](http://comments.amnat.org/2021/01/note-since-fall-2020-robert-montgomerie.html)  
62 [fall-2020-robert-montgomerie.html](http://comments.amnat.org/2021/01/note-since-fall-2020-robert-montgomerie.html)], the *Journal of Evolutionary Biology*  
63 [<https://jevbio.net/data-editing-at-jeb/> and [http://comments.amnat.org/2021/01/note-since-fall-](http://comments.amnat.org/2021/01/note-since-fall-2020-robert-montgomerie.html)  
64 [2020-robert-montgomerie.html](http://comments.amnat.org/2021/01/note-since-fall-2020-robert-montgomerie.html)], and the *American Economic Review* <sup>12</sup>). This extra step will  
65 further ensure the computational replicability of results, even at the potential monetary cost of  
66 this extra step.

#### 67 Pre-registration and Pre-Analysis Plans

68 A pre-analysis plan describes the research questions, the study design, and the methods that will  
69 be used in a study. As its name suggests, the plan is completed before data analysis begins

70 (ideally, before all the data have been collected). Pre-registration is the process of registering,  
71 before the study or data analysis begins, a researcher's intent to undertake a study and the study's  
72 pre-analysis plan <sup>13</sup>. Ideally, the pre-registration is digitally time-stamped and publicly available,  
73 so that third parties can confirm which questions and analyses were anticipated in advance and  
74 which were devised only after collecting, and perhaps analyzing, the data. To prevent competing  
75 researchers from "scooping" a study prior to its publication, pre-registration platforms typically  
76 allow researchers to keep their pre-registration private while the research is completed, although  
77 sometimes the length of this embargo is limited to several years <sup>14</sup>.

78 Preregistered analysis plans provide two main benefits. First, they help scholars quantify the "file  
79 drawer" problem: studies that were proposed, and perhaps completed, but never published.  
80 Studies may not be published for many reasons, but one reason is that the authors believed, or  
81 observed, that the results would not be acceptable to editors and peer (e.g., null results or  
82 statistically significant, but small estimated effects). Without pre-registration, scholars have no  
83 idea how many studies have been proposed and perhaps completed, but never published. That  
84 lack of knowledge can be costly for science; costly in terms of unnecessary repetition of studies  
85 and, when only serendipitously impressive results get published, exaggerated scientific claims.  
86 Knowing the full set of studies that may have been completed is also critical for ensuring that  
87 meta-analyses provide an accurate picture of what scientists have discovered <sup>15</sup>.

88 Second, pre-registered plans help scientists to be transparent in all their research decisions.  
89 Science benefits when scholars are limited in their ability to selectively report or frame their  
90 results after seeing the impact of their decisions on their results. For example, pre-registered  
91 plans help to clearly demarcate confirmatory analyses from exploratory analyses <sup>13,14,16</sup>.  
92 Confirmatory analyses seek to test a specific hypothesis or estimate a specific parameter,

93 whereas exploratory analyses probe the data to look for interesting patterns. For example, a  
94 confirmatory analysis may seek to estimate the effect size of phosphorus addition on plant  
95 productivity, whereas an exploratory analysis may use the same data to see whether phosphorous  
96 addition is correlated with any other ecosystem functions that are measured in the data set.  
97 Exploratory analyses are important because they help scientists generate hypotheses that can then  
98 be tested with different data. Yet when exploratory analyses are repackaged in publications as  
99 confirmatory analyses, science suffers. Indeed, these repackages exploratory analyses never have  
100 the chance to be falsified and may need complex hypothesis to accommodate the results<sup>17</sup>. A  
101 related problem is when an author, after seeing the results from an analysis, changes the  
102 hypothesis to better match the results (i.e., HARKing). Ideally, the author would report in the  
103 article that the published hypothesis was not the original hypothesis and thus readers should treat  
104 the analysis as more exploratory than confirmatory. With pre-registration, even if the author does  
105 not report this deviation from the original plan, a reviewer or reader of the article could easily  
106 check the study's pre-registration document to confirm whether the hypotheses reported were the  
107 original hypotheses of the study<sup>14,18</sup>.

108 Although pre-registration and pre-analysis plans are commonly associated with experimental  
109 designs, they can, and ought to be, used for all study designs. In fact, given that observational  
110 designs typically offer many more degrees of researcher freedom than experimental analyses,  
111 pre-registered plans may be even more important in observational designs than experimental  
112 designs.

113 Although journals and funders in ecology could require researchers to pre-register their studies  
114 and analysis plans<sup>13,16</sup>, we believe the widespread adoption of pre-registration in ecology will  
115 take time because ecologists will need to become accustomed to working out details that often

116 were left for the post-data collection phase. When starting the preregistration process, it may be  
117 difficult for researchers to anticipate all the choices they will have to make during the analysis  
118 phase <sup>16</sup>. For example, a researcher may not have decided what to do with outliers or how to  
119 transform skewed data. These additions to, and deviations from, the original plan can be  
120 incorporated into amendments to the pre-analysis plan and can be reported in the final  
121 publication. The point of preregistration is not to punish researchers for failing to anticipate an  
122 obstacle, but to promote transparency during all steps of the research process <sup>13</sup>, especially when  
123 researchers may forget what the original plan was and what deviations were made. Ideally, all  
124 pre-analysis plans would be registered before a study begins, but what does pre-registration mean  
125 for ongoing studies? In cases in which data collection is ongoing, researchers should try to  
126 preregister their subsequent analyses before new data are collected. As new ideas arise for old  
127 datasets, pre-analysis should also be submitted even though some of the data may be known to  
128 the researchers <sup>14</sup>.

129 In ecology, pre-analysis plans ought to include detailed methodology that relates to several of the  
130 issues we describe above. For example, ecologists should include some reasoning about why  
131 they chose a specific sample size, including any design calculations that justify the sample size  
132 or elucidate the uncertainty within a study design (e.g., power analyses for frequentist  
133 methodologies, assurance analyses for Bayesian methodologies <sup>19</sup>, or other design calculations  
134 <sup>20</sup>). In many cases, these design calculations will likely show that the number of replicates  
135 needed to credibly isolate signal from noise (e.g., power greater than 0.8) is logistically  
136 infeasible in terms of space, time, or money. Such conclusions do not mean that the studies  
137 should not be undertaken <sup>21</sup>, but rather highlight the need for more coordination across study  
138 teams and a greater reliance on meta-analyses rather than single studies in ecology <sup>15</sup>. Pre-



139 analysis plans should also include rationale with respect to correcting or not for multiple  
140 hypothesis testing. As noted above, studies testing multiple hypotheses in ecology are common,  
141 but few papers correct for these comparisons or state why they chose not to use corrections. In  
142 some cases, a simple solution is to differentiate, in the pre-analysis plan, the “primary”  
143 hypothesis from the “secondary” hypotheses. This differentiation implicitly frames some planned  
144 analyses as confirmatory (primary hypothesis) and others as exploratory (secondary hypotheses).

145 In sum, pre-registration and pre-analysis plans reduce, or at least make more transparent, the  
146 practices of HARKing, selective reporting of results, and presenting *ex post* exploratory analyses  
147 as if they were part of the original design <sup>14</sup>. Some authors argue that pre-registration and pre-  
148 analysis plans are unnecessary if scientists are transparent in all their decisions in their  
149 manuscripts and that they create an unnecessary barrier to conducting science <sup>22</sup>. However, when  
150 clinical trials in heart, blood and lung treatments were required to be preregistered, the pattern of  
151 reported results changed dramatically: in comparison to findings reported before preregistration  
152 was required, the magnitudes of the reported treatment effects decreased substantially with a  
153 corresponding increase in the number of negative and null findings <sup>23</sup>.

154 Pre-registered plans do not limit science. Rather, they limit the ways scientific results can be  
155 reported. Ecologists should be encouraged to explore their data or frame the results in ways that  
156 were not originally envisioned – but ecologists should also be required to report those deviations  
157 and the scientific community should have a way to confirm that those deviations are reported.

158 Pre-registration and pre-analysis plans help to achieve this goal.

159 Registered Reports & Results-Blind Reviews

160 Another step towards increased transparency is Registered Reports – a two stage review process  
161 (<https://www.cos.io/initiatives/registered-reports>). During the Registered Report process, an  
162 introduction and methods section outlining the study design and analysis are submitted for peer  
163 review. The merit of the study is judged based on the question being asked and the methods used  
164 to address that question, rather than the sign, magnitude, or statistical significance of the results.  
165 After a study is accepted in the first phase of the review process, reviewers in the second phase  
166 judge how closely the study follows the original plan and whether any deviations are substantial  
167 enough to affect the study quality <sup>24</sup>.

168 Registered Reports should reduce selective reporting of results. Studies have shown that  
169 registered reports decrease the amount of positive findings compared to conventional publication  
170 practices <sup>25,26</sup>. Registered reports should also help reviewers focus on the importance of the  
171 questions asked and quality of the study design, rather than the sign, magnitude, and statistical  
172 significance of the results. Indeed, a study found that researchers rated Registered Reports as  
173 being more rigorous in methodology and analysis, while not reducing novelty or creativity  
174 compared to non-Registered Report publications <sup>27</sup>. By emphasizing research questions and  
175 designs, registered reports make it more likely that ecologists can abandon NHST based on  
176 simple binary rules to decide when an estimate is ecologically relevant (e.g., if  $p < 0.05$  or Bayes  
177 Factor  $> 3$ ), a practice that warps the presentation and interpretation of empirical results <sup>28–32</sup>.

178 While Registered Reports are growing in popularity, few ecology publications are in this format.  
179 Currently, 12 ecology-related or general interest journals offer a Registered Reports option for  
180 submitting manuscripts (<https://www.cos.io/initiatives/registered-reports>; [Supplemental Table 1](#)).  
181 While the option for submitting Registered Reports has been around for several years at some  
182 journals, it seems that few researchers are aware of or using the process. For example,

183 *Conservation Biology* has published three Registered Reports, *Ecology and Evolution* has  
 184 published only one, and none have been received at the *Journal of Plant Nutrition and Soil*  
 185 *Science*. These journals are leading the way on Registered Reports, but there may need to be  
 186 other incentives to have this publication format become more popular. For example, funding  
 187 agencies could require this format, journals could spotlight these types of publications, or  
 188 departments could require or up-weight publications in this format for career advancement. A  
 189 preliminary written dissertation plan, where students' ideas and methods are critiqued by faculty,  
 190 is already almost in the Registered Report format <sup>16</sup>. Thus, moving from the status quo towards  
 191 greater use of Registered Reports is feasible and could be easily adopted for both early and later-  
 192 career researchers.

193 **Supplemental Table 1. Ecology or general interest journals that offer Registered Report format as of January**  
 194 **16, 2023.**

| Journal Name                                                | Website                                                                                                                                 |
|-------------------------------------------------------------|-----------------------------------------------------------------------------------------------------------------------------------------|
| BMC Biology                                                 | <a href="https://bmcbiol.biomedcentral.com/">https://bmcbiol.biomedcentral.com/</a>                                                     |
| Ecology & Evolution                                         | <a href="https://onlinelibrary.wiley.com/journal/20457758">https://onlinelibrary.wiley.com/journal/20457758</a>                         |
| Ecological Solutions & Evidence                             | <a href="https://besjournals.onlinelibrary.wiley.com/journal/26888319">https://besjournals.onlinelibrary.wiley.com/journal/26888319</a> |
| Environment International                                   | <a href="https://www.journals.elsevier.com/environment-international/">https://www.journals.elsevier.com/environment-international/</a> |
| Frontiers in Plant Science                                  | <a href="https://www.frontiersin.org/journals/plant-science#">https://www.frontiersin.org/journals/plant-science#</a>                   |
| <a href="#">Journal of Plant Nutrition and Soil Science</a> | <a href="https://onlinelibrary.wiley.com/journal/15222624">https://onlinelibrary.wiley.com/journal/15222624</a>                         |
| Nature Communications                                       | <a href="https://www.nature.com/ncomms/">https://www.nature.com/ncomms/</a>                                                             |
| PeerJ Life and Environment                                  | <a href="https://peerj.com/life-environment/">https://peerj.com/life-environment/</a>                                                   |

|                            |                                                                                               |
|----------------------------|-----------------------------------------------------------------------------------------------|
| PLoS Biology               | <a href="https://journals.plos.org/plosbiology/">https://journals.plos.org/plosbiology/</a>   |
| PLoS One                   | <a href="https://journals.plos.org/plosone">https://journals.plos.org/plosone</a>             |
| Royal Society Open Science | <a href="http://rsos.royalsocietypublishing.org/">http://rsos.royalsocietypublishing.org/</a> |
| Scientific Reports         | <a href="https://www.nature.com/srep/">https://www.nature.com/srep/</a>                       |

195

196 Similar to Registered Reports, results-blind reviews are another option to reduce publication bias  
 197 against negative results <sup>33</sup>. In fact, results-blind reviews may be a good first step because they are  
 198 closest to the current review process. Unlike Registered Reports where the study only starts after  
 199 the first review, researchers submitting a results-blind review may have completed the study and  
 200 written a complete manuscript – they simply do not include the results as part of the submitted  
 201 manuscript. Like Registered Reports, results-blind review can reduce reviewer bias against  
 202 negative results and can mitigate the pressure to engage in NHST guided by binary decision  
 203 rules. Unlike Registered Reports, however, it has no mechanism in place to reduce selective  
 204 reporting of results by the authors <sup>14,24,33</sup>.

205 Changing Incentives

206 In the “publish or perish” environment in which many researchers operate, the benefits of  
 207 engaging in these best practices are unlikely to exceed the costs without buy-in from the  
 208 institutions that matter - namely, employers, funders, and publishers. For example, funding  
 209 agencies could prioritize studies that use Registered Reports, such that high-profile grant  
 210 programs reinforce best practices in ecology. Employers should explicitly encourage examples of  
 211 credible, reproducible research and could require the practices outlined above for career  
 212 advancement in a way that, as a metric of success, puts best practices on par with number of  
 213 publications and impact factors of journals.

214 Among the practices that should be encouraged by employers, funders and publishers are  
215 replications of prior studies. Despite prior publications on the importance of replications <sup>11,34</sup>,  
216 one study found replications were rare in ecology <sup>35</sup>. Employers should value researchers who  
217 replicate studies just as much as researchers who find novel results. High impact journals can  
218 help make replications more professionally rewarding by publishing replications alongside of  
219 ground-breaking research.

220 Without a change in researcher incentives it is difficult to imagine that a change in research  
221 practices will happen on its own – despite how much scientists value credibility within their  
222 discipline <sup>36</sup>. Unfortunately, researchers’ professional incentives to publish novel and exciting  
223 studies are often at odds with their personal values of creating and disseminating credible science  
224 <sup>2,36,37</sup>. In fact, an ecology researcher who unilaterally adopts these practices may find herself at a  
225 disadvantage in the competition to place studies in high impact journals.

226

227 *Supplemental References*

- 228 1. Parker, T. H., Nakagawa, S. & Gurevitch, J. Promoting transparency in evolutionary  
229 biology and ecology. *Ecol. Lett.* **19**, 726–728 (2016).
- 230 2. Nosek, B. A., Spies, J. R. & Motyl, M. Scientific Utopia: II. Restructuring Incentives and  
231 Practices to Promote Truth Over Publishability. *Perspect. Psychol. Sci.* **7**, 615–631  
232 (2012).
- 233 3. Simmons, J. P., Nelson, L. D. & Simonsohn, U. False-positive psychology: Undisclosed  
234 flexibility in data collection and analysis allows presenting anything as significant.  
235 *Psychol. Sci.* **22**, 1359–1366 (2011).
- 236 4. Parker, T. H. *et al.* Empowering peer reviewers with a checklist to improve transparency.  
237 *Nat. Ecol. Evol.* **2**, 929–935 (2018).
- 238 5. Treadwell, J. R., Lucas, S. & Tsou, A. Y. Surgical checklists: A systematic review of  
239 impacts and implementation. *BMJ Qual. Saf.* **23**, 299–318 (2014).
- 240 6. Degani, A. & Wiener, E. L. Cockpit checklists: Concepts, design, and use. *Hum. Factors*  
241 **35**, 345–359 (1993).
- 242 7. Emerson, G. B. *et al.* Testing for the presence of positive-outcome bias is peer review.  
243 *Arch. Intern. Med.* **170**, 1934–1939 (2010).
- 244 8. Culina, A., van den Berg, I., Evans, S. & Sánchez-Tójar, A. Low availability of code in  
245 ecology: A call for urgent action. *PLoS Biol.* **18**, 1–9 (2020).
- 246 9. Munafò, M. R. *et al.* A manifesto for reproducible science. *Nat. Hum. Behav.* **1**, 1–9  
247 (2017).
- 248 10. Nosek, B. A. *et al.* Promoting an open research culture. *Science (80-. )*. **348**, 1422–1425  
249 (2015).

- 250 11. Nakagawa, S. & Parker, T. H. Replicating research in ecology and evolution: Feasibility,  
251 incentives, and the cost-benefit conundrum. *BMC Biol.* **13**, 1–6 (2015).
- 252 12. Vilhuber, L. Report by the AEA Data Editor. *AEA Pap. Proc.* **109**, 718–729 (2019).
- 253 13. Nosek, B. A., Ebersole, C. R., DeHaven, A. C. & Mellor, D. T. The preregistration  
254 revolution. *Proc. Natl. Acad. Sci. U. S. A.* **115**, 2600–2606 (2018).
- 255 14. Parker, T., Fraser, H. & Nakagawa, S. Making conservation science more reliable with  
256 preregistration and registered reports. *Conserv. Biol.* **33**, 747–750 (2019).
- 257 15. Nichols, J. D., Kendall, W. L. & Boomer, G. S. Accumulating evidence in ecology: Once  
258 is not enough. *Ecol. Evol.* **9**, 13991–14004 (2019).
- 259 16. Nosek, B. A. *et al.* Preregistration Is Hard, And Worthwhile. *Trends Cogn. Sci.* **23**, 815–  
260 818 (2019).
- 261 17. Rubin, M. When does HARKing hurt? Identifying when different types of undisclosed  
262 post hoc hypothesizing harm scientific progress. *Rev. Gen. Psychol.* **21**, 308–320 (2017).
- 263 18. National Academy of Sciences publishes questionable, potentially chance findings on the  
264 crime effects of restoring vacant urban lots. *Straight Talk on Evidence*  
265 [https://www.straighttalkonevidence.org/2018/09/11/national-academy-of-sciences-](https://www.straighttalkonevidence.org/2018/09/11/national-academy-of-sciences-publishes-overstated-findings-on-the-crime-effects-of-restoring-vacant-lots-that-could-have-appeared-by-chance/)  
266 [publishes-overstated-findings-on-the-crime-effects-of-restoring-vacant-lots-that-could-](https://www.straighttalkonevidence.org/2018/09/11/national-academy-of-sciences-publishes-overstated-findings-on-the-crime-effects-of-restoring-vacant-lots-that-could-have-appeared-by-chance/)  
267 [have-appeared-by-chance/](https://www.straighttalkonevidence.org/2018/09/11/national-academy-of-sciences-publishes-overstated-findings-on-the-crime-effects-of-restoring-vacant-lots-that-could-have-appeared-by-chance/) (2018).
- 268 19. Chen, D. G. (Din) & Ho, S. From statistical power to statistical assurance: It’s time for a  
269 paradigm change in clinical trial design. *Commun. Stat. Simul. Comput.* **46**, 7957–7971  
270 (2017).
- 271 20. Gelman, A. & Carlin, J. Beyond Power Calculations: Assessing Type S (Sign) and Type  
272 M (Magnitude) Errors. *Perspect. Psychol. Sci.* **9**, 641–651 (2014).

- 273 21. Lemoine, N. P. *et al.* Underappreciated problems of low replication in ecological field  
274 studies. *Ecology* **97**, 2562–2569 (2016).
- 275 22. Rubin, M. Does preregistration improve the credibility of research findings? *Quant.*  
276 *Methods Psychol.* **16**, 376–390 (2020).
- 277 23. Kaplan, R. M. & Irvin, V. L. Likelihood of null effects of large NHLBI clinical trials has  
278 increased over time. *PLoS One* **10**, 1–12 (2015).
- 279 24. Button, K. S., Bal, L., Clark, A. & Shipley, T. Preventing the ends from justifying the  
280 means: Withholding results to address publication bias in peer-review. *BMC Psychol.* **4**,  
281 1–7 (2016).
- 282 25. Allen, C. & Mehler, D. M. A. Open science challenges, benefits and tips in early career  
283 and beyond. *PLoS Biol.* **17**, 1–14 (2019).
- 284 26. Scheel, A. M., Schijen, M. R. M. J. & Lakens, D. An Excess of Positive Results:  
285 Comparing the Standard Psychology Literature With Registered Reports. *Adv. Methods*  
286 *Pract. Psychol. Sci.* **4**, (2021).
- 287 27. Soderberg, C. K. *et al.* Initial evidence of research quality of registered reports compared  
288 with the standard publishing model. *Nat. Hum. Behav.* **5**, 990–997 (2021).
- 289 28. Yoccoz, N. G. Use, Overuse, and Misuse of Significance Tests in Evolutionary Biology  
290 and Ecology. *Bull. Ecol. Soc. Am.* **72**, 106–111 (1991).
- 291 29. Fidler, F., Fraser, H., McCarthy, M. A. & Game, E. T. Improving the transparency of  
292 statistical reporting in Conservation Letters. *Conserv. Lett.* **11**, 1–5 (2018).
- 293 30. Amrhein, V. & Greenland, S. Retire statistical significance. *Nature* **567**, 305–307 (2019).
- 294 31. Wasserstein, R. L., Schirm, A. L. & Lazar, N. A. Moving to a World Beyond “ $p < 0.05$ ”.  
295 *Am. Stat.* **73**, 1–19 (2019).



- 296 32. Anderson, D. R., Burnham, K. P. & Thompson, W. L. Null hypothesis testing: Problems,  
297 prevalence, and an alternative. *J. Wildl. Manage.* **64**, 912–923 (2000).
- 298 33. Smulders, Y. M. A two-step manuscript submission process can reduce publication bias.  
299 *J. Clin. Epidemiol.* **66**, 946–947 (2013).
- 300 34. Fraser, H., Barnett, A., Parker, T. H. & Fidler, F. The role of replication studies in  
301 ecology. *Ecol. Evol.* **10**, 5197–5207 (2020).
- 302 35. Kelly, C. D. Rate and success of study replication in ecology and evolution. *PeerJ* **2019**,  
303 (2019).
- 304 36. Anderson, M. S., Martinson, B. C. & De Vries, R. Normative dissonance in science:  
305 Results from a national survey of U.S. scientists. *J. Empir. Res. Hum. Res. Ethics* 3–14  
306 (2007).
- 307 37. O’Dea, R. E. *et al.* Towards open, reliable, and transparent ecology and evolutionary  
308 biology. *BMC Biol.* **19**, 1–5 (2021).
- 309
